# Supplementary material for: On demand production of ethers or alcohols from furfural and HMF by selecting the composition of a Zr/Si catalyst
Source: Royal Society of Chemistry journal article supplement (doi:10.1039/d0cy01427c), 2020-01-01
Supplement: d0cy01427c1.pdf [file d0cy01427c1.pdf]

Supporting information

**On demand production of ethers or alcohols from furfural and HMF by  
selecting the composition of a Zr/Si catalyst**

*Federica Zaccheria<sup>a</sup>, Filippo Bossola<sup>a</sup>, Nicola Scotti<sup>a\*</sup>, Claudio Evangelisti<sup>b</sup>, Vladimiro Dal Santo<sup>a</sup>,  
and Nicoletta Ravasio<sup>a</sup>*

<sup>a</sup>CNR, Istituto di scienze e tecnologie chimiche “Giulio Natta” (SCITEC), via Golgi 19, 20133  
Milano, Italy.

<sup>b</sup>CNR, Istituto di Chimica dei Composti Organometallici (ICCOM), via G. Moruzzi 1, 56124 Pisa,  
Italy.

[\\*nicola.scotti@scitec.cnr.it](mailto:nicola.scotti@scitec.cnr.it)

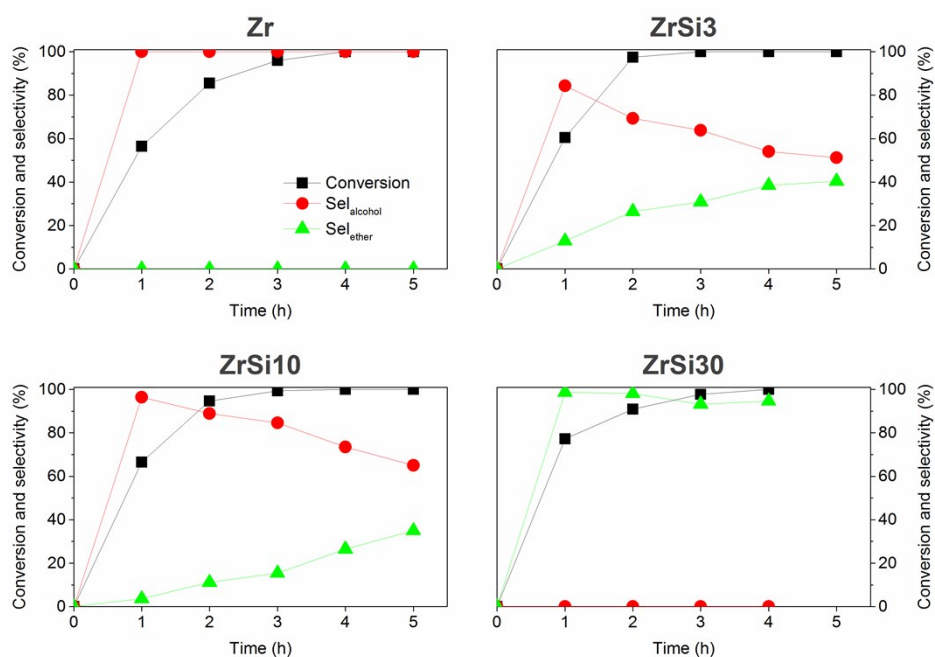

**Figure S1.** Reaction profiles for the conversion of furfural over the different catalysts (120 °C, 2-butanol,  $N_2 = 1$  atm).

| Catalyst                            | Alcohol              | t (h) | C (%) | Product Yields (%)                                                                  |                                                                                      |                                                                                          |
|-------------------------------------|----------------------|-------|-------|-------------------------------------------------------------------------------------|--------------------------------------------------------------------------------------|------------------------------------------------------------------------------------------|
|                                     |                      |       |       |  |  |  OR |
| ZrO <sub>2</sub> + SiO <sub>2</sub> | 2-butanol            | 4     | 63    | 60                                                                                  | 0                                                                                    | 0                                                                                        |
| ZrSi30                              | 2-octanol            | 4     | 95    | 0                                                                                   | 90                                                                                   | 0                                                                                        |
| ZrSi30                              | 1-butanol            | 4     | 96    | 0                                                                                   | 7                                                                                    | 57                                                                                       |
|                                     |                      | 8     | 99    | 0                                                                                   | 19                                                                                   | 35                                                                                       |
| ZrSi30                              | <i>tert</i> -butanol | 4     | 0     | 0                                                                                   | 0                                                                                    | 0                                                                                        |

**Table S1.** Additional experiments (furfural = 0.1 g, alcohol = 0.084 mol, 120 °C)

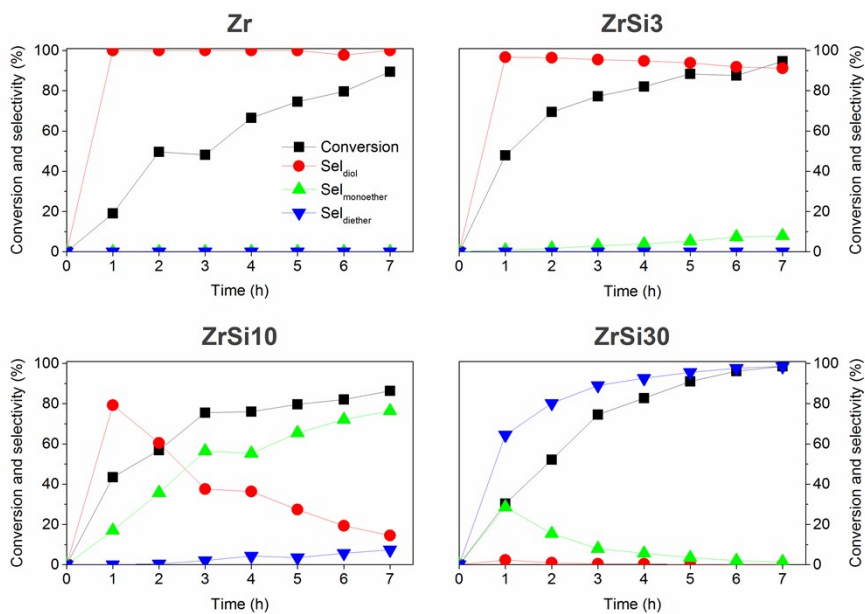

**Figure S2.** Reaction profiles for the conversion of HMF over the different catalysts (120 °C, 2-butanol, N<sub>2</sub> = 1 atm).

### Ydi-ether

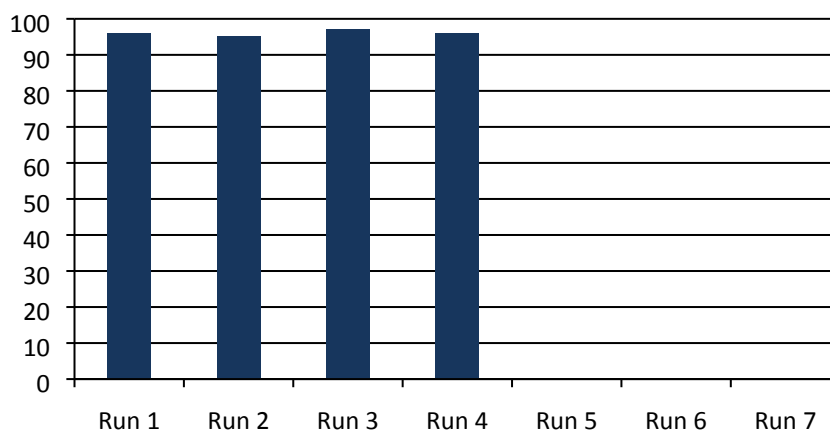

**Figure S3.** Recycling of ZrSi30 in the HMF conversion to di-ether (7h)

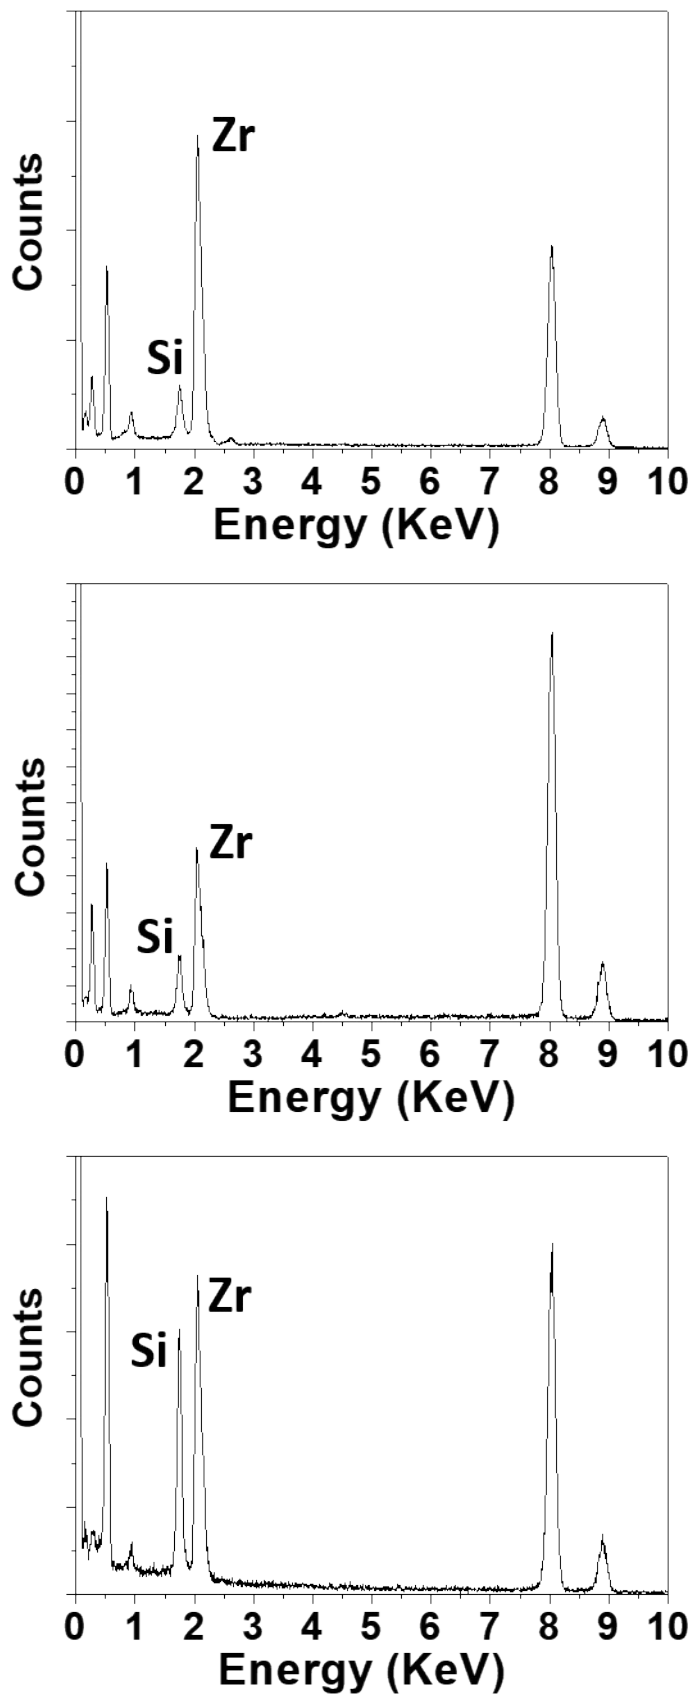

**Figure S4.** EDX spectrum of a representative catalyst grain of ZeSi<sub>3</sub> (top), ZeSi<sub>10</sub> (medium) and ZrSi<sub>30</sub> (bottom). The signals at 8.0 and 8.9 are Cu signals originated from the copper grid.

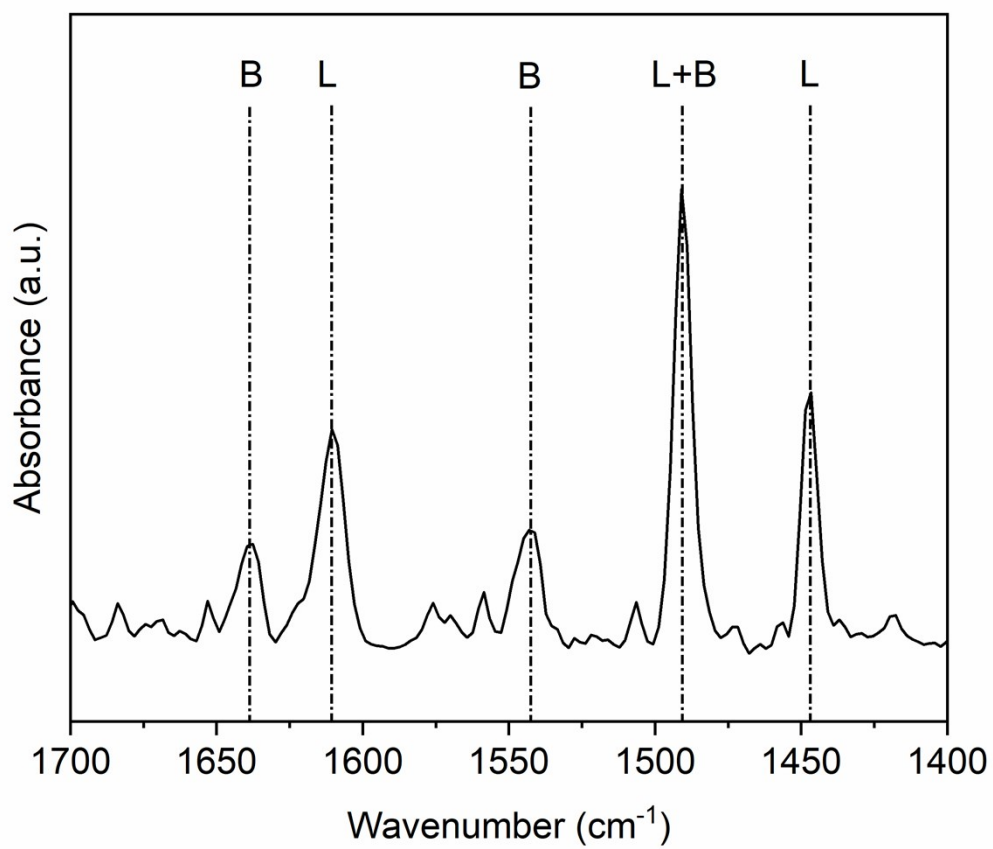

**Figure S5.** FT-IR pyridine desorption spectra collected at 120 °C of the recovered and regenerated ZrSi30 catalyst.
